1 **Attachment-related anxiety and social anxiety: the mediating role of self-esteem**

2 *Self-esteem mediates the relationship between attachment-related anxiety and social anxiety*

3

4

5 Jacob Lincoln\*, Liesbeth Muriel Tip\*\*, Sofia De La Fuente Garcia\*\*\*

6 \*NHS Highland

7 \*\* Mindler UK

8 \*\*\* Department of Clinical Psychology, School of Health in Social Sciences, University of

9 Edinburgh

10

11 Corresponding author: Jacob Lincoln

12 Email address: [Jacob.lincoln@nhs.scot](mailto:Jacob.lincoln@nhs.scot)

13

14 Acknowledgements:

15 We would like to express gratitude to the participants in this study, for the time they put into  
16 completing our survey.

17 We would also like to thank Ye Tang, Ke Ju, Jiawei Wang, and Jessie Kan, who contributed  
18 to the process of creating our survey, and writing our research proposal and ethics  
19 application, as well as contributing their thoughts and ideas about this study.

20

21 **NOTE: This preprint reports new research that has not been certified by peer review and should not be used to guide clinical practice.**

**Abstract**

22  
23  
24  
25  
26  
27  
28  
29  
30  
31  
32  
33  
34  
35  
36  
37  
38  
39  
40  
41

Numerous studies have found an association between attachment-related anxiety and social anxiety. However, none have investigated the potential role of the internal working model of the self in explaining this relationship. The purposes of this study were to replicate the finding that attachment-related anxiety and social anxiety are associated, and to test whether the internal working model of the self mediated this relationship. The internal working model of the self was operationalised by measuring self-esteem. It was hypothesised that attachment-related anxiety, self-esteem, and social anxiety would be intercorrelated, and that self-esteem would mediate the relationship between attachment-related anxiety and social anxiety. A sample of 63 adults (79.4% female) was recruited through social media, University course groups, and snowball sampling. Participants completed an online survey that consisted of a reduced version of the anxiety subscale of the Experiences in Close Relationships-Revised Scale, the Rosenberg Self-Esteem Scale, and the Social Interaction Anxiety Scale. Ethical approval was given by the University of Edinburgh School of Health in Social Science Research Ethics Committee. Pearson correlation tests showed that attachment-related anxiety, self-esteem, and social anxiety were intercorrelated. A mediation analysis conducted using the *PROCESS* v4.0 macro for SPSS, found that the indirect effect of attachment-related anxiety on social anxiety through self-esteem was significant. This finding is congruent with a theoretical account linking attachment-related anxiety to social anxiety through the mediating role of the internal working model of the self.

42  
43  
44  
45

46

## Introduction

47 Social anxiety is characterised by a fear of negative evaluation by others.(1) Most people  
48 experience some degree of social anxiety in certain situations, such as job interviews or first  
49 dates.(2) However, for some people, social anxiety occurs more frequently and may impact  
50 even mundane decisions, to the point of avoiding certain social situations or experience  
51 intense discomfort during them.(3) A higher degree of social anxiety is associated with less  
52 satisfying experiences in romantic (4) and peer (5) relationships, as well as being viewed as  
53 less likeable by others.(6) It is also a risk factor for depression.(7)

54 Social anxiety symptoms exist on a continuum, and people who experience social anxiety  
55 may, or may not, meet the clinical criteria for Social Anxiety Disorder (SAD).(8) In Europe,  
56 the median 12-month prevalence of SAD is 2%,(9) and it disproportionately affects young  
57 people and females.(10) SAD usually emerges during childhood or adolescence.(11)

58 Whilst social anxiety has been widely researched, its aetiology is not yet fully  
59 understood.(12) One widely researched framework for improving our understanding of social  
60 anxiety is that of attachment theory. As indicated in a recent systematic review, adult  
61 attachment is associated with social anxiety.(13) Experiences in attachment relationships may  
62 contribute to social anxiety by shaping people's views of themselves and others.(14) This  
63 study tested an aspect of this claim by examining whether self-esteem mediated the  
64 relationship between attachment-related anxiety and social anxiety in adults. If this is the  
65 case, then interventions aimed at improving self-esteem may decouple attachment-related  
66 anxiety and social anxiety, and, therefore, be a viable method of treating social anxiety.

### 67 **Adult Attachment and Social Anxiety**

68 Attachment theory could improve our understanding of the aetiology of social anxiety,  
69 through its theory of internal working models (IWMs) of the self and others. IWMs – a key

70 explanatory tool within attachment theory – may explain the development of the views of the  
71 self and others that underly social anxiety.(14)

72 Attachment theory emerged in the second half of the 20<sup>th</sup> century with the publication  
73 of seminal works by Bowlby (15–17) and Ainsworth.(18) Bowlby argued that infants are  
74 innately endowed with a system to facilitate the forming of close bonds with their primary  
75 caregiver(s).(19) This system gives rise to instinctive behaviours, such as proximity-seeking,  
76 that promote the development of attachment bonds.

77 Interactions between the infant and the caregiver can be shaped by the degree of the  
78 caregiver’s sensitive responsiveness to these behaviours.(18) Repeated patterns of interaction  
79 in infant-caregiver dyads are believed to be gradually internalised by the infant, leading to  
80 different possible patterns of attachment-related behaviour in future interactions.(17)  
81 Ainsworth and colleagues proposed that these patterns could be sorted into secure and  
82 insecure (avoidant and anxious-ambivalent) categories.(18) Securely attached infants are  
83 believed to use their caregiver as a secure base from which to venture into the world, and to  
84 return to in the face of stressful situations. Avoidant infants experience anxiety about the  
85 caregiver’s responsiveness and therefore display detachment from the caregiver in unfamiliar  
86 contexts. Anxious-ambivalent infants appear distressed in unfamiliar contexts and display  
87 attachment-seeking behaviours but may appear angry and inconsolable when reunited with  
88 the caregiver.(18) Subsequent longitudinal research has demonstrated that infant attachment  
89 security predicts future mental health and interpersonal functioning.(20–22)

90 Researchers have conceptualised adult romantic love using the framework of  
91 attachment theory.(23) For example, Hazan and Shaver (23) argued that adult romantic love  
92 is an attachment process, and that patterns of attachment in romantic relationships mirror  
93 Ainsworth’s typology of attachment styles in infant-caregiver dyads.(18,23) However,

94 subsequent research has shown that adult attachment patterns can be understood as  
95 dimensional, not categorical.(24,25) In addition, factor analytic studies have demonstrated  
96 that self-reported adult attachment may reflect both attachment-related anxiety and  
97 attachment-related avoidance.(26) These two factors may play a role in explaining the  
98 development of social anxiety.

99         These anxiety and avoidance dimensions have been conceptualised as two subsystems  
100 of the attachment system.(27,28) The attachment-related anxiety subsystem monitors and  
101 evaluates the likelihood of achieving attachment-related goals, such as the reciprocation of  
102 feelings for a romantic partner. The attachment-related avoidance subsystem regulates  
103 attachment-promoting behaviours, for example seeking proximity to attachment figures.  
104 Individual differences in attachment-related anxiety and avoidance scores reflect variation in  
105 the functioning of these two subsystems.(27) An above-average score on attachment-related  
106 anxiety indicates a high degree of concern about one's ability to meet attachment-related  
107 goals whereas a high score on attachment-related avoidance reflects a tendency to avoid  
108 proximity to attachment figures.(27)

109         A number of studies have found positive associations between social anxiety and  
110 attachment-related anxiety and avoidance. In a systematic review, Manning and  
111 colleagues(13) examined 30 studies that tested for correlations between adult attachment and  
112 social anxiety. 28 of the studies found that insecure attachment and social anxiety were  
113 positively correlated.(13) Subsequent research has also found this to be the case.(29,30)  
114 Some earlier studies that investigated the relationship between adult attachment and social  
115 anxiety used categorical measures of attachment,(31,32) which fail to reflect the latent  
116 structure of individual differences in adult attachment.(24,27) However, most recent studies  
117 have used variants of the Experiences in Close Relationships Scale (ECR),(26) which is a  
118 valid measure of the anxiety and avoidance dimensions.(27,33) That said, only one study has

119 specifically investigated the role that the two dimensions play in predicting social anxiety  
120 symptoms.(30) This study aimed to extend this limited research by exploring the relationship  
121 between attachment-related anxiety and social anxiety.

122

### 123 **The Internal Working Model of the Self**

124 Whilst previous studies have reported associations between adult attachment and  
125 social anxiety, little attention has been paid to explaining this relationship. The current study  
126 contends that attachment-related anxiety and avoidance may contribute to the development of  
127 social anxiety through the mechanism of IWMs of the self and others.(14) IWMs are mental  
128 representations of interactional patterns with attachment figures which guide interpretations  
129 of, and predictions about, interpersonal events, as well as decisions as to how one should  
130 interact.(34) These models are hypothesised to evolve gradually during infancy as a result of  
131 repeated patterns of interaction occurring within infant-caregiver dyads.(15) They are  
132 conceived as dynamic, meaning that they are the basis for mental simulations of interactional  
133 patterns.(34) Although Bowlby argued that they function automatically and outside of  
134 conscious awareness,(17) elsewhere he acknowledged that they include an affective element,  
135 which allows for the appraisal of the self and others as good or bad.(15,34)

136 Bowlby held IWMs of the self and others to be the mechanism by which infant  
137 attachment styles affect later personality, relationship patterns, and interpersonal  
138 functioning.(15) Given that social anxiety occurs within interpersonal contexts and is a  
139 function of one's expectations about oneself and others,(35) it is plausible that negative  
140 IWMs of the self and/or of others shape these expectations and thus contribute to the  
141 development of social anxiety.(13,14)

142           If IWMs contribute to social anxiety in the manner just outlined, then they may  
143 explain the relationship between attachment-related anxiety and social anxiety. Sustained  
144 anxiety about an attachment figure’s continued love or availability (attachment-related  
145 anxiety) may lead to a view of the self as unworthy of attention and support, i.e., a negative  
146 IWM of the self.(14,36) This negative IWM of the self may, in turn, contribute to the  
147 development of social anxiety.(35) By virtue of this reasoning, this study argues that the  
148 IWM of the self may explain the relationship between attachment-related anxiety and social  
149 anxiety.

150

### 151 **The Mediating Role of Self-Esteem**

152           In this study, it was hypothesised that self-esteem mediated the relationship between  
153 attachment related anxiety and social anxiety. Self-esteem is understood as the individual’s  
154 overall judgement of themselves as good or bad.(37) It is believed to incorporate both  
155 cognitive and affective elements.(38,39) Additionally, it has been argued that self-esteem  
156 functions within a relational context as a ‘sociometer’: a gauge of the degree of a person’s  
157 perceived inclusion or exclusion by others.(40) Thus, both self-esteem and the IWM of the  
158 self are argued to indicate the individual’s evaluation of their own self-worth in a relational  
159 context, suggesting an overlap between the two constructs. With this in mind, the IWM of the  
160 self was operationalised by measuring participants’ self-esteem.

161           The current study was not the first to operationalise the IWM of the self in this way.  
162 Applying similar theoretical grounding, Seon(41) tested the relationship between insecure  
163 attachment, self-esteem and social anxiety in a sample of Korean children. As in the present  
164 study, self-esteem was held as an appropriate measure of participants’ IWMs of the self.  
165 Seon’s(41) findings indicated that self-esteem mediated the relationship between the other

166 two variables. However, the current study was the first to test this hypothesis in an adult  
167 sample.

168 Research indicates close ties between attachment-related anxiety, social anxiety, and  
169 self-esteem in adults. Leary and colleagues' (35,42) self-presentation theory posits that social  
170 anxiety occurs when an individual is motivated to make a particular impression on an  
171 audience that is perceived as important, but doubts that they will succeed in doing so. Self-  
172 esteem is viewed as a gauge of the individual's perceived inclusion or exclusion by important  
173 others, with low self-esteem indicating that the individual considers themselves likely to be  
174 excluded(35,40). This belief may in turn produce an increase in the individual's level of  
175 social anxiety(35). This account is empirically supported. For example, self-esteem is  
176 negatively associated with both SAD and social anxiety symptoms.(43–45) Additionally,  
177 Baldwin and Main(46) found that cueing participants to think about being socially rejected  
178 led to increased social anxiety, suggesting that social anxiety may be the output of an internal  
179 sociometer.(35)

180 Self-esteem is also negatively associated with attachment-related anxiety.(47–49)  
181 Furthermore, a meta-analysis of longitudinal studies found that self-esteem and social  
182 relationships reciprocally influence each other.(50) This is congruent with the idea that  
183 attachment-related experiences affect self-esteem. Together, the findings discussed constitute  
184 grounds for the hypothesis that self-esteem mediates the relationship between attachment-  
185 related anxiety and social anxiety.

186

### 187 **Purpose of the Present Study**

188 This study sought to explore one possible explanation for the relationship between  
189 attachment-related anxiety and social anxiety, namely the mediating role of the IWM of the



190 self. The IWM of the self was operationalised by measuring participants' self-esteem. The  
191 research questions were as follows: 1) are attachment-related anxiety and social anxiety  
192 associated? and 2) does self-esteem mediate the relationship between attachment-related  
193 anxiety and social anxiety? The implications of attachment theory and the explanatory  
194 importance of IWMs within it led to the following hypotheses: 1) attachment-related anxiety  
195 is positively associated with social anxiety, 2) attachment-related anxiety is negatively  
196 associated with self-esteem, 3) social anxiety is negatively associated with self-esteem, and 4)  
197 self-esteem mediates the relationship between attachment-related anxiety and social anxiety.  
198 These hypotheses were tested by means of an anonymous, quantitative survey. The study was  
199 intended to improve our understanding of the relationship between adult attachment and  
200 social anxiety, specifically by exploring whether the IWM of the self may explain this  
201 relationship. If this is the case, then interventions aimed at improving self-esteem may  
202 decouple attachment-related anxiety and social anxiety, and therefore be a viable method of  
203 treating social anxiety.

204

205

206

207

208

209

210

211

212

213 **Methods**

214 **Participants**

215 Participants were adults over the age of 18 sampled from the general population ( $N =$   
216 63, 79.4% female). All participants were residents of the United Kingdom at the time of  
217 participation. Table 1 shows the sociodemographic characteristics of the participants.

218

**Table 1**

*Sociodemographic Characteristics of Participants*

| Factor                       | n  | %    |
|------------------------------|----|------|
| Gender                       |    |      |
| Male                         | 13 | 20.6 |
| Female                       | 50 | 79.4 |
| Age group                    |    |      |
| 18-24                        | 44 | 69.8 |
| 25-34                        | 12 | 19   |
| 35-44                        | 3  | 4.8  |
| 45-54                        | 1  | 1.6  |
| 55-64                        | 3  | 4.8  |
| Relationship status          |    |      |
| Married                      | 4  | 6.3  |
| In a relationship            | 21 | 33.3 |
| Divorced                     | 1  | 1.6  |
| Single                       | 33 | 52.4 |
| Never been in a relationship | 3  | 4.8  |
| Prefer not to say            | 1  | 1.6  |
| Ethnic background            |    |      |
| White/Caucasian              | 23 | 36.5 |
| Asian/Asian British          | 38 | 60.3 |
| Other                        | 1  | 1.6  |
| Prefer not to say            |    | 1.6  |

219

220

221 **Measures**

222 ***Demographic Questionnaire.***

223 Participants were asked to report their gender, age group, relationship status and  
224 ethnic background.

225 *Anxiety Subscale of the Experiences in Close Relationships Revised Scale (ECR-R)*(51),

226 *Shortened.*

227 To measure their degree of attachment-related anxiety, participants completed a shortened  
228 version of the Anxiety subscale of the ECR-R. The ECR-R was designed to capture the two  
229 dimensions of adult attachment – anxiety and avoidance(51) – whereas some alternative  
230 instruments incorrectly assume that adult attachment can be categorised into discrete  
231 styles.(23) The measure is more predictive of variance in anxiety and avoidance in adult  
232 romantic relationships (the focus of this study) than within family relationships or  
233 friendships.(52) It has high test-retest reliability(33) and internal consistency(51) and is  
234 widely used in attachment research.(53)

235 Participants responded to statements on a seven-point Likert scale, ranging from 1 =  
236 *Strongly Disagree* to 7 = *Strongly Agree*. The statements were intended to test participants’  
237 degree of attachment-related anxiety within their romantic relationships, with a higher score  
238 indicating a higher degree of attachment-related anxiety. The statements included: “I’m  
239 afraid that I will lose my partner’s love” and “I worry a lot about my relationships”. A factor  
240 analysis conducted by Sibley and colleagues was used to shorten the subscale, in order to  
241 reduce the amount of time needed to complete the survey.(52) The full subscale has 18 items,  
242 and it was shortened by removing the nine items that loaded least strongly on the Anxiety  
243 subscale, leaving nine items in total. In this study, the remaining nine items, which were the  
244 instrument used to measure attachment-related anxiety, had an internal consistency of .94  
245 (Cronbach’s alpha).

246 *Social Interaction Anxiety Scale (SIAS)*.(54)

247 The SIAS was used to assess participants’ general social anxiety, or fear of and during  
248 social interaction. The SIAS is commonly used in social anxiety research as a measure of the

249 fear of interaction in generic social situations, and the items reflect anxiety in a variety of  
250 different social interactional contexts.(55,56) The SIAS has high test-retest reliability and  
251 internal consistency, as well as good convergent validity.(54)

252 The SIAS is a 20-item Likert scale which requires participants to endorse statements  
253 about their cognitive, emotional, and behavioural responses to different social scenarios, such  
254 as meeting new people. Responses are scored from 0 to 4, where 0 = *Not at all* and 4 =  
255 *Extremely*. Three of the items have to be reverse-scored, and a higher score indicates a higher  
256 degree of social anxiety. The statements include: “I have difficulty making eye contact with  
257 others” and “I am nervous mixing with people I don’t know well”. Cronbach’s alpha in this  
258 study was .90.

### 259 ***Rosenberg Self-Esteem Scale (RSES).***(37)

260 The RSES was used to measure participants’ degree of self-esteem. The scale has  
261 good test-retest reliability(57) and internal consistency.(58) Furthermore, Trzesniewski and  
262 colleagues found that RSES scores in adolescents predicted subsequent mental health  
263 outcomes, indicating that the instrument is predictively valid, as well as relevant to this  
264 study.(59)

265 The RSES is a four-point, ten-item Likert scale in which statements are rated from  
266 *Strongly Agree* to *Strongly Disagree*. Five of the ten items have to be reverse-scored, and a  
267 higher score indicates a higher degree of self-esteem. The statements include: “On the whole,  
268 I am satisfied with myself” and “I feel I do not have much to be proud of”. In this  
269 dissertation, Cronbach’s alpha was .85.

### 270 **Procedure**

271 Participants were recruited via the University of Edinburgh’s online learning portal  
272 and social media platforms, as well as through word-of-mouth. A flyer with a link to the

273 study was shared on these platforms along with a standard message explaining the purpose of  
274 the study, the inclusion criteria, and the contact details of one of the researchers. The  
275 participants followed a link to the questionnaire, which was created using the Online Surveys  
276 platform. They were required to read a Participant Information Sheet and asked to consent to  
277 participate in the study, and to their data being utilised by the researchers. They were also  
278 debriefed after completing the survey and directed to mental health resources. No personally-  
279 identifiable information was collected, and a numerical ID was allocated automatically to  
280 each participant, ensuring anonymity and confidentiality. Ethical approval to conduct this  
281 study was given by the University of Edinburgh School of Health in Social Science Research  
282 Ethics Committee (5<sup>th</sup> May 2022).

### 283 *Quantitative Analyses*

284 All analyses were carried out using IBM SPSS Statistics 25. Hypotheses 1-3 (that  
285 attachment-related anxiety, self-esteem and social anxiety would be intercorrelated) were  
286 tested with bivariate Pearson correlations. Multiple regression analyses were used to test  
287 whether the relationships between each of the pairs of variables remained significant when  
288 controlling for the third variable. Significance was tested at the  $\alpha = .05$  and  $\alpha = .01$  levels for  
289 the Pearson correlations and the multiple regression analyses. Following Armstrong's(60)  
290 recommendations, the Bonferroni correction was not applied to adjust for multiple tests. The  
291 mediation analysis required to test hypothesis 4 was conducted using the *PROCESS* v4.0  
292 macro.(61) The indirect effect was estimated by entering social anxiety as the outcome  
293 variable, attachment-related anxiety as the independent variable, and self-esteem as the  
294 mediating variable, then selecting Model 4.

295 The bootstrap method for testing mediation was used. The use of bootstrapping as a  
296 method of estimating the precision of the estimates is advantageous because it does not

297 assume that the sampling distribution of the parameter being estimated is normally  
298 distributed.(62) This is valuable in this context because clinical constructs, such as social  
299 anxiety, often have skewed distributions in normal populations,(62) and because the small  
300 sample size may have led to reduced power to detect a deviation from normality.(63) The  
301 bias-corrected bootstrap method has been shown to have higher power than other approaches,  
302 including Baron and Kenny’s traditional method for testing mediation,(64) which is  
303 advantageous given the small sample used in this study.(65)

304 The 95% confidence intervals of the indirect effect were estimated using the bias-  
305 corrected accelerated bootstrap, with 5000 bootstrap samples requested. This method  
306 produces a range of values within which the effect size of the indirect effect would lie in 95%  
307 of studies. If the 95% confidence intervals do not contain zero, then this indicates that in 95%  
308 of studies, the indirect effect would not be zero. This finding supports the rejection of the null  
309 hypothesis. Conversely, if the confidence intervals contain zero, then the null hypothesis  
310 cannot be rejected.(63)

311

### 312 ***Power Analysis***

313 To estimate the required sample size, an a priori power analysis was conducted using  
314 Schoemann and colleagues’ online application: Monte Carlo Power Analysis for Indirect  
315 Effects.(66) This method was selected because it is preferable to analytical methods, such as  
316 those implemented in G\*Power, when estimating the indirect effect of a mediation model  
317 using bootstrapping.(67) Target power was not achieved, however, due to a slow response  
318 rate and limited time.

319

320

## 321 Results

### 322 Descriptive Statistics

323 Total scores on the three scales were computed by summing the participants' scores  
324 on each of the items. Due to the small sample size, missing cases were replaced with the  
325 series mean (i.e., the mean of all the values in the variable) in order to retain power. No  
326 outliers were identified. Table 2 shows the means, standard deviations, minimums, and  
327 maximums of each scale.

**Table 2**

*Correlations, Means, Standard Deviations, Minimums, and Maximums*

|                    | Correlations |        | Mean  | SD    | Min | Max |
|--------------------|--------------|--------|-------|-------|-----|-----|
|                    | 2            | 3      |       |       |     |     |
| Attachment anxiety | -.44**       | .41**  | 30.59 | 14.59 | 10  | 63  |
| Self-esteem        |              | -.53** | 17.65 | 5.08  | 5   | 27  |
| Social anxiety     |              |        | 33.79 | 13.98 | 8   | 68  |

\*\* $p < .01$

### 328 Analyses

329 The assumptions of the linear model were met.(63) That is, the outcome variable  
330 (social anxiety) was linearly related to both predictors (attachment-related anxiety and self-  
331 esteem). A Durbin-Watson test indicated that the errors were uncorrelated. To test for  
332 homoscedasticity, the standardised predicted values were plotted against the standardized  
333 residuals; no pattern was visible, indicating that the variance of the standardised residuals was  
334 constant. A normality test indicated that the standardised residuals were normally distributed.  
335 Finally, the Pearson correlation tests indicated that multicollinearity fell below the  
336 permissible threshold.(68)

### 337 Hypotheses 1-3

338 Pearson correlation tests were used to assess the associations between the three  
 339 variables; table 2 shows the zero-order correlations between the variables. The relationship  
 340 between attachment-related anxiety and social anxiety was assessed. As hypothesised, the  
 341 Pearson correlation test showed that the two were positively correlated,  $r = .41, p = .001$ . The  
 342 relationship between attachment-related anxiety and self-esteem was also assessed. As  
 343 hypothesised, the Pearson correlation test showed that the two were negatively correlated,  $r =$   
 344  $-.44, p = .000$ . Finally, the relationship between social anxiety and self-esteem was assessed.  
 345 As hypothesised, the Pearson correlation test showed that the two were negatively correlated,  
 346  $r = -.53, p = .000$ . All of these correlations were significant at the  $\alpha = .01$  level.

347 Given the demographics of the sample (see Table 1) post-hoc exploratory tests were  
 348 undertaken to check ethnicity and gender as potential moderators, but no significant effects  
 349 were found. Post-hoc multiple regression analyses with enter method were also conducted to  
 350 test whether each of these relationships remained significant when controlling for the third  
 351 variable. Table 3 shows the three multiple regression models. Attachment-related anxiety  
 352 and social anxiety no longer predicted each other when controlling for self-esteem, which is  
 353 congruent with hypothesis 4, that self-esteem mediates the relationship between the other two  
 354 variables.

355  
 356 **Table 3**

357 *Results of Multiple Regression Analyses Predicting Social Anxiety, Attachment-Related  
 Anxiety and Self-Esteem*

| Dependent variable     | Predictors         | <i>B</i> | <i>SE b</i> | $\beta$ | <i>p</i> |
|------------------------|--------------------|----------|-------------|---------|----------|
| 359 Social anxiety     | Attachment anxiety | .21      | .11         | .22     | .066     |
|                        | Self-esteem        | -1.18    | .33         | -.43    | .001**   |
| 360 Attachment anxiety | Social anxiety     | .26      | .14         | .25     | .066     |
|                        | Self-esteem        | -.89     | .38         | -.31    | .023*    |
| 361 Self-esteem        | Attachment anxiety | -.09     | .04         | -.27    | .023*    |
|                        | Social anxiety     | -.15     | .04         | -.42    | .001**   |

362  
 363 \*\* $p < .01$  \* $p < .05$



364 **Hypothesis 4**

365 Figure 1 shows the mediation model and its unstandardised beta coefficients. Table 4  
366 shows the unstandardised and standardised beta coefficients of the mediation model. The  
367 total effect model explained a statistically significant amount of the variance in social  
368 anxiety,  $F(1, 61) = 12.45, p = .001, R^2 = .17$ . The total effect ( $c$ ) of attachment-related anxiety  
369 on social anxiety was significant,  $b = .43, \beta = .41, t(60) = 3.53, p = .001$ . The direct effect ( $c'$ )  
370 of attachment-related anxiety on social anxiety was not significant,  $b = .26, \beta = .25, t(60) =$   
371  $1.87, p = .066$ . The indirect effect ( $ab$ ) of attachment-related anxiety on social anxiety  
372 through self-esteem was significant,  $b = .17, \beta = .16, 95\% \text{ BCa CI } [.01, .37]$ . The indirect  
373 effect accounted for 39% of the association between attachment-related anxiety and social  
374 anxiety ( $\beta_{\text{indirect effect}} / \beta_{\text{total effect}}$ , i.e.,  $.17/.43$ ). The significant indirect effect indicates that, as  
375 hypothesised, self-esteem mediates the relationship between attachment-related anxiety and  
376 social anxiety in this sample.

377

378 **Fig 1.**

379 *Unstandardised beta coefficients for the mediation model with social anxiety as the dependent*  
380 *variable*

381

382

383

384

385

386

387

388

389

390 **\*\*  $p < .01$ , \*  $p < .05$**

391

**Table 4**

*The Beta Coefficients of the Mediation Model with Social Anxiety as the Dependent Variable*

|         |             | Total effect                  | Direct effect                 |               |               | Indirect effect                |
|---------|-------------|-------------------------------|-------------------------------|---------------|---------------|--------------------------------|
| IV      | Mediator    | <i>b</i> , $\beta$ , <i>p</i> | <i>b</i> , $\beta$ , <i>p</i> | IV-M <i>b</i> | M-DV <i>b</i> | <i>b</i> [95% BCa CI], $\beta$ |
| Att anx | Self-esteem | .43, .41, .001                | .26, .25, .066                | -.89          | -.19          | .17, [.01, .37], .16           |

*Note.* Att anx = attachment-related anxiety. BCa CI = Bias-corrected accelerated confidence intervals.

392

393

394

395

396

397

398

399

400

401

402

403

404

405

406

407

408

## Discussion

409 This study tested a mediation model with self-esteem as mediator in the relationship  
410 between attachment-related anxiety and social anxiety. All three of the variables were  
411 intercorrelated in the hypothesised directions. Multiple regression analyses indicated that  
412 attachment-related anxiety and social anxiety did not predict each other when controlling for  
413 self-esteem, but that self-esteem predicted both attachment-related anxiety and social anxiety.  
414 However, this was a post-hoc exploratory analysis and should therefore be treated with  
415 caution.(69)The 95% confidence intervals of the indirect effect of attachment-related anxiety  
416 on social anxiety did not contain zero, indicating that the null hypothesis could not be  
417 kept.(70) Thus, in all four cases, the results supported the rejection of the null hypotheses. It  
418 should be noted that females, Asians and young people (18-24) were overrepresented in the  
419 study sample. These findings may therefore not be generalisable to the rest of the population.

420 The fact that attachment-related anxiety, social anxiety, and self-esteem were all  
421 intercorrelated coheres with previous findings.(13,43–45,48,49). This study built on these  
422 findings by demonstrating that self-esteem mediates the relationship between attachment-  
423 related anxiety and social anxiety. Whilst self-esteem has been found to mediate insecure  
424 parental attachment and social anxiety in Korean children,(41) this study extended this  
425 finding to romantic attachment in an adult British population. The results hereby presented  
426 are congruent with a theoretical account linking attachment-related anxiety to social anxiety  
427 through the mechanism of the IWM of the self.(14) Individuals who score high on  
428 attachment-related anxiety have a high degree of anxiety about their ability to meet  
429 attachment-related goals.(27) This may lead to the construction of a model of the self as  
430 unworthy of attention and support.(71) Viewing oneself in this way may, in turn, lead to  
431 increased social anxiety(14). However, due to the observational and cross-sectional design of  
432 the study, causality was not established.

433 One of Kazdin's (72) criteria for inferring the occurrence of a causal process is that  
434 this process is predicted by a broader scientific theory. A strength of this study is therefore  
435 that the mediation hypothesis was derived from a theoretical account of the effects of  
436 attachment experiences on later outcomes, which can be, and has been, applied to the  
437 development of social anxiety.(14) The IWM construct is a well-established and widely  
438 researched element of attachment theory, and there is agreement amongst attachment  
439 researchers as to its explanatory importance.(34,73) Moreover, Vertue's (14) unifying theory  
440 of the development of social anxiety held IWMs to be the crucial mechanism underlying it. It  
441 is therefore theoretically plausible that the IWM of the self is the mechanism that links  
442 attachment-related anxiety and social anxiety.

443 The findings of this study raise questions that could be explored in future research.  
444 First, one should consider how self-esteem relates to other mediators of the relationship  
445 between adult attachment and social anxiety that have been identified. These include  
446 cognitive variables such as emotion regulation strategies,(30) cognitive flexibility,(74) locus  
447 of control, and repetitive thinking (75) evolutionary variables, namely social comparison and  
448 submissive behaviour (76); depression (77); hope (78); social approach and avoidance  
449 motivation (79); and perceived social support.(80) Manning and colleagues (13) note that the  
450 overlap or association between these variables is unknown. It is therefore plausible that some  
451 of these significant indirect effects are the result of the variables being confounded with one  
452 another. For example, depression is negatively associated with self-esteem.(81) Future  
453 process research with relation to attachment and social anxiety could explore this possibility.

454 A second question raised by this study is whether its logic could be applied to  
455 attachment-related *avoidance* and its relationship to social anxiety. Manning and colleagues'  
456 (13) review indicates that the two constructs are about as strongly associated as attachment-  
457 related anxiety and social anxiety. Whilst attachment-related anxiety has been linked to a

458 negative IWM of the self, it is argued that attachment-related avoidance relates to negative  
459 IWMs of others.(71,82) It could therefore be argued that attachment-related avoidance leads  
460 to social anxiety through the mechanism of negative IWMs of others.

#### 461 **Limitations**

462 This study had several limitations. First, the sample was relatively small, and the  
463 primary disadvantage of a small sample size is that it increases the likelihood of a Type II  
464 error, that is, the failure to reject the null hypothesis when it is false.(83) The target power  
465 level of .80 was not achieved, meaning that the likelihood of a Type II error was higher than  
466 20%.(84) Despite this, the null hypotheses were indeed rejected, and our findings are  
467 congruent with the effects hypothesised in the introduction.

468 Second, the instrument used to measure attachment-related anxiety was a shortened  
469 non-validated version of one subscale from the ECR-R, in favour of a shorter procedure.  
470 Internal consistency was high ( $\alpha = .94$ ), indicating that the instrument measured a single  
471 construct; however, it is possible that removing some items led to reduced reliability or  
472 validity. This issue could be addressed in future research by using already validated measures  
473 of attachment-related anxiety, such as the full ECR-R, or the Experiences in Close  
474 Relationships Scale – Short Form.(85)

475 Third, the data collected for this study were of a cross-sectional nature. An essential  
476 criterion for establishing that a mediator plays a causal role is that the predictor, outcome, and  
477 mediator variables exist in appropriate temporal relation to each other.(72) Specifically, the  
478 mediator should precede the dependent variable, and the independent variable should precede  
479 both the mediator and the dependent variable. This cannot be established using cross-  
480 sectional data, and this study therefore does not show that attachment-related anxiety leads to  
481 social anxiety through the mechanism of self-esteem. This is a critique that can be levelled at

482 most of the past studies examining potential mediators of the relationship between adult  
483 attachment and social anxiety.(30,74–80)

484 To examine the temporal relationships between adult attachment, social anxiety, and  
485 potential mediators, future research should use longitudinal methods. One study has  
486 successfully examined the longitudinal relationship between adult attachment and later social  
487 anxiety.(31) In this study, participants responded to questionnaires at two time points, and  
488 insecure adult attachment at Time 1 was found to predict social anxiety at Time 2. However,  
489 given the dimensional nature of adult attachment,(25,51) the study's use of a categorical  
490 instrument to measure attachment limits the value of this finding.(13) More longitudinal  
491 research is therefore warranted.

492 A final limitation of this study is that all of the variables were measured using self-  
493 report instruments. Utilising instruments of this nature introduces the risk of bias due to  
494 various method effects.(86) However, this risk is less significant in cases when the construct  
495 validity of the variable(s) in question has been established, for example by testing for  
496 convergent and discriminant validity.(86) Research has supported the convergent and  
497 discriminant validity of the instruments utilised in this study.(52,56,87) Therefore, this risk of  
498 bias should not be overemphasised. A more important aspect of this limitation relates  
499 specifically to the use of self-reported self-esteem as a measure of the IWM of the self. IWMs  
500 are posited to operate outside of conscious awareness,(17) meaning that any self-report  
501 instrument would be unlikely to accurately capture these processes.(73) It is plausible that the  
502 self-esteem measure tracks the affective element of the IWM of the self, i.e., as either good or  
503 bad,(34) however this is only one aspect of the overall construct.

504

505 **Future directions**

506 This study did not control for potentially confounding variables, apart from ethnic  
507 background and gender. For example, Aderka and colleagues found that, when controlling for  
508 submissive behaviour and social comparison, adult attachment no longer predicted social  
509 anxiety.(76) That said, although Aderka and colleagues used the ECR to measure attachment,  
510 they did not distinguish between the attachment-related anxiety and avoidance factors.(76)  
511 Other potential confounds include depression(81,88) and personality variables such as  
512 neuroticism.(89–91) Future research should control for these variables to test whether the  
513 relationship between social anxiety and attachment-related anxiety is robust.

514 Future research could also use implicit methods as a means of accessing the  
515 unconscious processes at the root of IWMs.(73) For example, in one study, participants'  
516 working models were inferred from their written interpretations of relationship events.(92)

517

## 518 **Implications for Clinical Practice**

519 Current best practices for treating SAD include cognitive-behavioural therapy (CBT)  
520 and pharmacotherapy.(93) Conceptual research, such as reported in this paper, can inform the  
521 application of CBT to case-conceptualisations for social anxiety. Clinicians may wish to  
522 explore the role that experiences in attachment relationships, and attachment-related anxiety,  
523 play in leading to or maintaining social anxiety symptoms. They may also consider the IWM  
524 of the self and/or self-esteem as factors underlying the development of social anxiety. A  
525 concrete implication is that intervening to improve self-esteem may be a viable method of  
526 reducing social anxiety, although further research would be required to establish a causal link  
527 between self-esteem and social anxiety. For example, in line with Rapee and Heimberg's  
528 model, cognitive-behavioural therapists may attempt to guide patients with SAD in

529 restructuring negative cognitive representations of the self.(94) In this way, social anxiety  
530 symptoms could be decoupled from the attachment-related anxiety that may underlie them.

### 531 **Conclusion**

532 This study confirmed significant associations between attachment-related anxiety,  
533 social anxiety, and self-esteem in a predominantly young, female and Asian sample. This  
534 study built on this finding by testing whether self-esteem mediated the relationship between  
535 attachment-related anxiety and social anxiety; our statistical analyses indicate that mediation  
536 did occur. Although the data were cross-sectional, the findings are congruent with a  
537 theoretical account linking attachment-related anxiety to social anxiety through the  
538 mechanism of a negative IWM of the self. Further research and longitudinal study designs are  
539 warranted to explore the role that IWMs may play in linking attachment and social anxiety,  
540 and adding an indirect measurement of IWMs is recommended.

541

542

543

544

545

546

547

548

549

550

551

552

553



554

## References

- 555 1. Schneier FR. Social anxiety disorder. *BMJ*. 2003;327(7414):515–6.
- 556 2. Leary MR, Kowalski RM. *Social Anxiety*. 1997.
- 557 3. Association AP. *Diagnostic and statistical manual of mental disorders*. 5th ed. 2022.
- 558 4. Porter E, Chambless DL. Social anxiety and social support in romantic relationships. *Behav*  
559 *Ther*. 2017;48(3):335–48.
- 560 5. Vernberg EM, Abwender DA, Ewell KK, Beery SH. Social anxiety and peer relationships in  
561 early adolescence: A prospective analysis. *J Clin Child Psychol*. 1992;21(2):189–96.
- 562 6. Gee BA, Antony MM, Koerner N, Aiken A. Appearing anxious leads to negative judgments  
563 by others. *J Clin Psychol*. 2012;68(3):304–18.
- 564 7. Stein MB, Fuetsch M, Müller N, Höfler M, Lieb R, Wittchen HU. Social anxiety disorder and  
565 the risk of depression: a prospective community study of adolescents and young adults. *Arch*  
566 *Gen Psychiatry*. 2001;58(3):251–6.
- 567 8. Rapee RM, Spence SH. The etiology of social phobia: Empirical evidence and an initial  
568 model. *Clin Psychol Rev*. 2004;24(7):737–67.
- 569 9. Wittchen HU, Jacobi F, Rehm J, Gustavsson A, Svensson M, Jönsson B, et al. The size and  
570 burden of mental disorders and other disorders of the brain in Europe 2010. *European*  
571 *neuropsychopharmacology*. 2011;21(9):655–79.
- 572 10. Fehm L, Pelissolo A, Furmark T, Wittchen HU. Size and burden of social phobia in Europe.  
573 *European neuropsychopharmacology*. 2005;15(4):453–62.
- 574 11. Stein MB, Stein DJ. Social anxiety disorder. *The lancet*. 2008;371(9618):1115–25.
- 575 12. Spence SH, Rapee RM. The etiology of social anxiety disorder: An evidence-based model.  
576 *Behaviour Research and Therapy*. 2016;86:50–67.
- 577 13. Manning RPC, Dickson JM, Palmier-Claus J, Cunliffe A, Taylor PJ. A systematic review of  
578 adult attachment and social anxiety. *J Affect Disord*. 2017;211:44–59.
- 579 14. Vertue FM. From adaptive emotion to dysfunction: An attachment perspective on social  
580 anxiety disorder. *Personality and Social Psychology Review*. 2003;7(2):170–91.
- 581 15. Bowlby J. *Attachment and loss*. Vol. 1. London: Pimlico; 1997.
- 582 16. Bowlby J. *Attachment and loss*. Vol. 2. London: Pimlico; 1998.
- 583 17. Bowlby J. *Attachment and loss*. Vol. 3. London: Pimlico; 1998.
- 584 18. Ainsworth MDS, Bell SM, Stayton DJ. Infant–Mother Attachment and Social  
585 Development: ‘Socialisation’ as a Product of Reciprocal Responsiveness to Signals. . In:  
586 Woodhead M, editor. *Becoming a person*. Routledge; 2013. p. 30–55.
- 587 19. Bowlby J. The nature of the child’s tie to his mother. In: Ferman AC, Levy ST, editors.  
588 *Influential Papers from the 1950s*. Routledge; 2018. p. 222–73.
- 589 20. Fearon RP, Bakermans-Kranenburg MJ, Van IJzendoorn MH, Lapsley AM, Roisman GI. The  
590 significance of insecure attachment and disorganization in the development of children’s  
591 externalizing behavior: a meta-analytic study. *Child Dev*. 2010;81(2):435–56.

- 592 21. Groh AM, Roisman GI, van IJzendoorn MH, Bakermans-Kranenburg MJ, Fearon RP. The  
593 significance of insecure and disorganized attachment for children's internalizing symptoms: A  
594 meta-analytic study. *Child Dev.* 2012;83(2):591–610.
- 595 22. Groh AM, Fearon RP, Bakermans-Kranenburg MJ, van IJzendoorn MH, Steele RD, Roisman  
596 GI. The significance of attachment security for children's social competence with peers: A  
597 meta-analytic study. *Attach Hum Dev.* 2014;16(2):103–36.
- 598 23. Hazan C, Shaver P. Romantic love conceptualized as an attachment process. *J Pers Soc*  
599 *Psychol.* 1987;83(2):511–24.
- 600 24. Fraley RC, Hudson NW, Heffernan ME, Segal N. Are adult attachment styles categorical or  
601 dimensional? A taxometric analysis of general and relationship-specific attachment  
602 orientations. *J Pers Soc Psychol.* 2015;109(2):354–68.
- 603 25. Fraley RC, Waller NG. Adult attachment patterns: A test of the typological model. In:  
604 Simpson JA, Rholes RS, editors. *Attachment theory and close relationships*. The Guilford  
605 Press; 1998. p. 77–114.
- 606 26. Brennan KA, Clark CL, Shaver PR. Self-report measurement of adult attachment: An  
607 integrative overview. In: Simpson JA, Rholes WS, editors. *Attachment theory and close*  
608 *relationships*. New York: The Guilford Press; 1998. p. 46–76.
- 609 27. Fraley RC, Shaver PR. Adult romantic attachment: Theoretical developments, emerging  
610 controversies, and unanswered questions. *Review of General Psychology.* 2000;4(2):132–54.
- 611 28. Gillath O, Karantzas GC, Fraley RC. *Adult attachment: A concise introduction to theory and*  
612 *research*. Academic Press; 2016.
- 613 29. Chen Y, Li R, Zhang P, Liu X. The moderating role of state attachment anxiety and avoidance  
614 between social anxiety and social networking sites addiction. *Psychol Rep.* 2020;123(3):633–  
615 47.
- 616 30. Read DL, Clark GI, Rock AJ, Coventry WL. Adult attachment and social anxiety: The  
617 mediating role of emotion regulation strategies. *PLoS One.* 2018;13(12).
- 618 31. Bifulco A, Kwon J, Jacobs C, Moran PM, Bunn A, Beer N. Adult attachment style as mediator  
619 between childhood neglect/abuse and adult depression and anxiety. *Soc Psychiatry Psychiatr*  
620 *Epidemiol.* 2006;41(10):796–805.
- 621 32. Mickelson KD, Kessler RC, Shaver PR. Adult attachment in a nationally representative  
622 sample. *J Pers Soc Psychol.* 1997;41(10):1092–106.
- 623 33. Sibley CG, Liu JH. Short-term temporal stability and factor structure of the revised  
624 experiences in close relationships (ECR-R) measure of adult attachment. *Pers Individ Dif.*  
625 2004;36(4):969–75.
- 626 34. Bretherton I, Munholland KA. Internal working models in attachment relationships:  
627 Elaborating a central construct in attachment theory. In: Cassidy J, Shaver PR, editors.  
628 *Handbook of attachment: Theory, research, and clinical applications*. 2nd ed. 2008. p. 102–27.
- 629 35. Leary MR, Jongman-Sereno KP. Social anxiety as an early warning system: A refinement and  
630 extension of the self-presentation theory of social anxiety. In: Hofmann SG, DiBartolo PM,  
631 editors. *Social Anxiety*. 3rd ed. Elsevier; 2014. p. 579–97.
- 632 36. Ollendick TH, Benoit KE. A parent–child interactional model of social anxiety disorder in  
633 youth. *Clin Child Fam Psychol Rev.* 2012;15:81–91.

- 634 37. Rosenberg M. *Society and the adolescent self-image*. Princeton University Press; 2015.
- 635 38. Brown JD, Marshall MA. Self-Esteem and Emotion: Some Thoughts About Feelings. *Pers Soc*  
636 *Psychol Bull.* 2001;27(5):575–84.
- 637 39. Fennell MJ. Low self-esteem: A cognitive perspective. *Behavioural and Cognitive*  
638 *Psychotherapy.* 1997;25(1):1–26.
- 639 40. Leary MR, Tambor ES, Terdal SK, Downs DL. Self-esteem as an interpersonal monitor: The  
640 sociometer hypothesis. *J Pers Soc Psychol.* 1995;68(3):518–30.
- 641 41. Seon Y. Self-esteem as a mediator of parental attachment security and social anxiety. *Psychol*  
642 *Sch.* 2021;58(8):1545–56.
- 643 42. Schlenker BR, Leary MR. Social anxiety and self-presentation: A conceptualization model.  
644 *Psychol Bull.* 1982;92(3):641–69.
- 645 43. Iancu I, Bodner E, Ben-Zion IZ. Self esteem, dependency, self-efficacy and self-criticism in  
646 social anxiety disorder. *Compr Psychiatry.* 2015;58:165–71.
- 647 44. Fatima M, Niazi S, Ghayas S. Relationship between self-esteem and social anxiety: Role of  
648 social connectedness as a mediator. *Pakistan journal of social and clinical psychology.*  
649 2017;15(2):12–7.
- 650 45. Jiang S, Ngien A. The effects of Instagram use, social comparison, and self-esteem on social  
651 anxiety: A survey study in Singapore. *Soc Media Soc.* 2020;6(2).
- 652 46. Baldwin MW, Main KJ. Social anxiety and the cued activation of relational knowledge.  
653 *knowledge Personality and Social Psychology Bulletin.* 2001;27(12):1637–47.
- 654 47. Brennan KA, Morris KA. Attachment styles, self-esteem, and patterns of seeking feedback  
655 from romantic partners. *Pers Soc Psychol Bull.* 1997;23(1):23–31.
- 656 48. Doinita NE. Adult attachment, self-esteem and emotional intelligence. *Procedia-Social and*  
657 *Behavioral Sciences.* 2015;187:570–4.
- 658 49. Sechi C, Vismara L, Brennstuhl MJ, Tarquinio C, Lucarelli L. Adult attachment styles, self-  
659 esteem, and quality of life in women with fibromyalgia. *Health Psychol Open.* 2020;7(2).
- 660 50. Harris MA, Orth U. The link between self-esteem and social relationships: A meta-analysis of  
661 longitudinal studies. *J Pers Soc Psychol.* 2020;119(6):1459–77.
- 662 51. Fraley RC, Waller NG, Brennan KA. An item response theory analysis of self-report measures  
663 of adult attachment. *J Pers Soc Psychol.* 2000;78(2):350–65.
- 664 52. Sibley CG, Fischer R, Liu JH. Reliability and validity of the revised experiences in close  
665 relationships (ECR-R) self-report measure of adult romantic attachment. *Pers Soc Psychol*  
666 *Bull.* 2005;31(11):1524–36.
- 667 53. Ravitz P, Maunder R, Hunter J, Sthankiya B, Lancee W. Adult attachment measures: A 25-  
668 year review. *J Psychosom Res.* 2010;69(4):419–32.
- 669 54. Mattick RP, Clarke JC. Development and validation of measures of social phobia scrutiny fear  
670 and social interaction anxiety. *Behaviour research and therapy.* 1998;36(4):455–70.
- 671 55. Fan Q, Chang WC. Social anxiety among Chinese people. *The Scientific World Journal.* 2015;

- 672 56. Thompson T, Kaminska M, Marshall C, Van Zalk N. Evaluation of the social phobia scale and  
673 social interaction anxiety scale as assessments of performance and interaction anxiety.  
674 *Psychiatry Res.* 2019;273:725–31.
- 675 57. Webster GD, Smith C V, Brunell AB, Paddock EL, Nezek JB. Can Rosenberg’s (1965)  
676 Stability of Self Scale capture within-person self-esteem variability? Meta-analytic validity  
677 and test–retest reliability. *J Res Pers.* 2017;69:156–69.
- 678 58. Tinakon W, Nahathai W. A comparison of reliability and construct validity between the  
679 original and revised versions of the Rosenberg Self-Esteem Scale. *Psychiatry Investig.*  
680 2012;9(1):54–8.
- 681 59. Trzesniewski KH, Donnellan MB, Moffitt TE, Robins RW, Poulton R, Caspi A. Low self-  
682 esteem during adolescence predicts poor health, criminal behavior, and limited economic  
683 prospects during adulthood. *Dev Psychol.* 2006;42(2):381–90.
- 684 60. Armstrong RA. When to use the Bonferroni correction. *Ophthalmic and Physiological Optics.*  
685 2014;34(5):502–8.
- 686 61. Hayes AF. Introduction to mediation, moderation, and Introduction to mediation, moderation,  
687 and conditional process analysis: A regression-based approach. Guilford Publications; 2017.
- 688 62. Wright DG, London K, Field AP. Using bootstrap estimation and the plug-in principle for  
689 clinical psychology data. *J Exp Psychopathol.* 2011;2(2):252–70.
- 690 63. Field A. *Discovering statistics using IBM SPSS statistics.* Sage; 2013.
- 691 64. Baron RM, Kenny DA. The moderator–mediator variable distinction in social psychological  
692 research: Conceptual, strategic, and statistical considerations. *J Pers Soc Psychol.*  
693 1986;51(6):1173–82.
- 694 65. Fritz MS, MacKinnon DP. Required sample size to detect the mediated effect. *Psychol Sci.*  
695 2007;18(3):233–9.
- 696 66. Schoemann AM, Boulton AJ, Short SD. Determining power and sample size for simple and  
697 complex mediation models. *Soc Psychol Personal Sci.* 2017;8(4):379–86.
- 698 67. Zhang Z. Monte Carlo based statistical power analysis for mediation models: Methods and  
699 software. *Behav Res Methods.* 2014;46:1184–98.
- 700 68. Alin A. Multicollinearity. *WIREs Computational Statistics.* 2010;2(3):370–4.
- 701 69. Elliot HL. Post hoc analysis: use and dangers in perspective. *J Hypertens Suppl.* 1996;14(2).
- 702 70. du Prel JB, Hommel G, Röhrig B, Blettner M. Confidence Interval or P-Value? *Dtsch Arztebl*  
703 *Int.* 2009;106(19):335–9.
- 704 71. Griffin DW, Bartholomew K. Models of the self and other: Fundamental dimensions  
705 underlying measures of adult attachment. *J Pers Soc Psychol.* 1994;67(3):67–3.
- 706 72. Kazdin AE. Mediators and mechanisms of change in psychotherapy research. *Annu Rev Clin*  
707 *Psychol.* 2007;3:1–27.
- 708 73. Pietromonaco PR, Barrett LF. The internal working models concept: What do we really know  
709 about the self in relation to others? *Review of general psychology.* 2000;4(2):155–75.
- 710 74. Dağ İ, Gülüm V. Yetişkin Bağlanma Örüntüleri İle Psikopatoloji Belirtileri Arasındaki İlişkide  
711 Bilişsel Özelliklerin Aracı Rolü: Bilişsel Esneklik. *Turk Psikiyatri Dergisi.* 2013;24(4).

- 712 75. Gülüm İ V, Dağ İ. Yetişkin bağlanma örüntüleri ile psikopatoloji belirtileri arasındaki ilişkide  
713 bilişsel özelliklerin aracı rolü: kontrol odağı ve tekrarlayıcı düşünme [The mediator role of the  
714 cognitive features in the relationship between adult attachment patterns and psychopathology  
715 symptoms: The locus of control and repetitive thinking]. *Türk Psikiyatri Dergisi*.  
716 2014;25(4):244–52.
- 717 76. Aderka IM, Weisman O, Shahar G, Gilboa-Schechtman E. The roles of the social rank and  
718 attachment systems in social anxiety. *Pers Individ Dif*. 2009;47(4):284–8.
- 719 77. Gajwani R, Patterson P, Birchwood M. Attachment: Developmental pathways to affective  
720 dysregulation in young people at ultra-high risk of developing psychosis. *British Journal of*  
721 *Clinical Psychology*. 2013;52(4):424–37.
- 722 78. McDermott RC, Cheng HL, Wright C, Browning BR, Upton AW, Sevig TD. Adult attachment  
723 dimensions and college student distress: The mediating role of hope. *Couns Psychol*.  
724 2015;43(6):822–52.
- 725 79. Nikitin J, Freund AM. When wanting and fearing go together: The effect of co-occurring  
726 social approach and avoidance motivation on behavior, affect, and cognition. *Eur J Soc*  
727 *Psychol*. 2010;40(5):783–804.
- 728 80. Roring SA. The relationships among adult attachment style, perceived social support, and  
729 social anxiety in college students. Oklahoma State University. 2008;
- 730 81. Sowislo JF, Orth U. Does low self-esteem predict depression and anxiety? A meta-analysis of  
731 longitudinal studies. *Psychol Bull*. 2013;139(1):213–40.
- 732 82. Bartholomew K. Avoidance of Intimacy: An Attachment Perspective. *Psychol Bull*.  
733 1990;7(2):147–78.
- 734 83. Shreffler J, Huecker MR. Type I and Type II errors and statistical power. In: StatPearls.  
735 StatPearls Publishing; 2020.
- 736 84. Serdar CC, Cihan M, Yücel D, Serdar MA. Sample size, power and effect size revisited:  
737 simplified and practical approaches in pre-clinical, clinical and laboratory studies. *Biochem*  
738 *Med (Zagreb)*. 2021;31(1):27–53.
- 739 85. Wei M, Russell DW, Mallinckrodt B, Vogel DL. The Experiences in Close Relationship Scale  
740 (ECR)-Short Form: Reliability, Validity, and Factor Structure. *J Pers Assess*. 2007;88(2):187–  
741 204.
- 742 86. Chan D. So why ask me? Are self-report data really that bad. In: Lance CE, Vandenberg RJ,  
743 editors. *Statistical and methodological myths and urban legends: Doctrine, verity and fable in*  
744 *the organizational and social sciences*. Routledge; 2009. p. 309–36.
- 745 87. Robins RW, Hendin HM, Trzesniewski KH. Measuring global self-esteem: Construct  
746 validation of a single-item measure and the Rosenberg Self-Esteem Scale. *Pers Soc Psychol*  
747 *Bull*. 2001;27(2):151–61.
- 748 88. Eng W, Heimberg RG, Hart TA, Schneier FR, Liebowitz MR. Attachment in individuals with  
749 social anxiety disorder: The relationship among adult attachment styles, social anxiety, and  
750 depression. *Emotion*. 2001;1(4):365–80.
- 751 89. Crawford TN, Shaver PR, Goldsmith HH. How affect regulation moderates the association  
752 between anxious attachment and neuroticism. *Attach Hum Dev*. 2007;9(2):95–109.

- 753 90. Newby J, Pitura VA, Penney AM, Klein RG, Flett GL, Hewitt PL. Neuroticism and  
754 perfectionism as predictors of social anxiety. *Pers Individ Dif*. 2017;106:263–7.
- 755 91. Schmitz N, Kugler J, Rollnik J. On the relation between neuroticism, self-esteem, and  
756 depression: results from the National Comorbidity Survey. *Compr Psychiatry*.  
757 2003;44(3):169–76.
- 758 92. Collins NL. Working models of attachment: Implications for explanation, emotion, and  
759 behavior. *J Pers Soc Psychol*. 1996;71(4):810–32.
- 760 93. Pelissolo A, Abou Kassm S, Delhay L. Therapeutic strategies for social anxiety disorder:  
761 where are we now? *Expert Rev Neurother*. 2019;19(12):1179–89.
- 762 94. Rapee RM, Heimberg RG. A cognitive-behavioral model of anxiety in social phobia.  
763 *Behaviour research and therapy*. 1997;35(8):741–56.
- 764

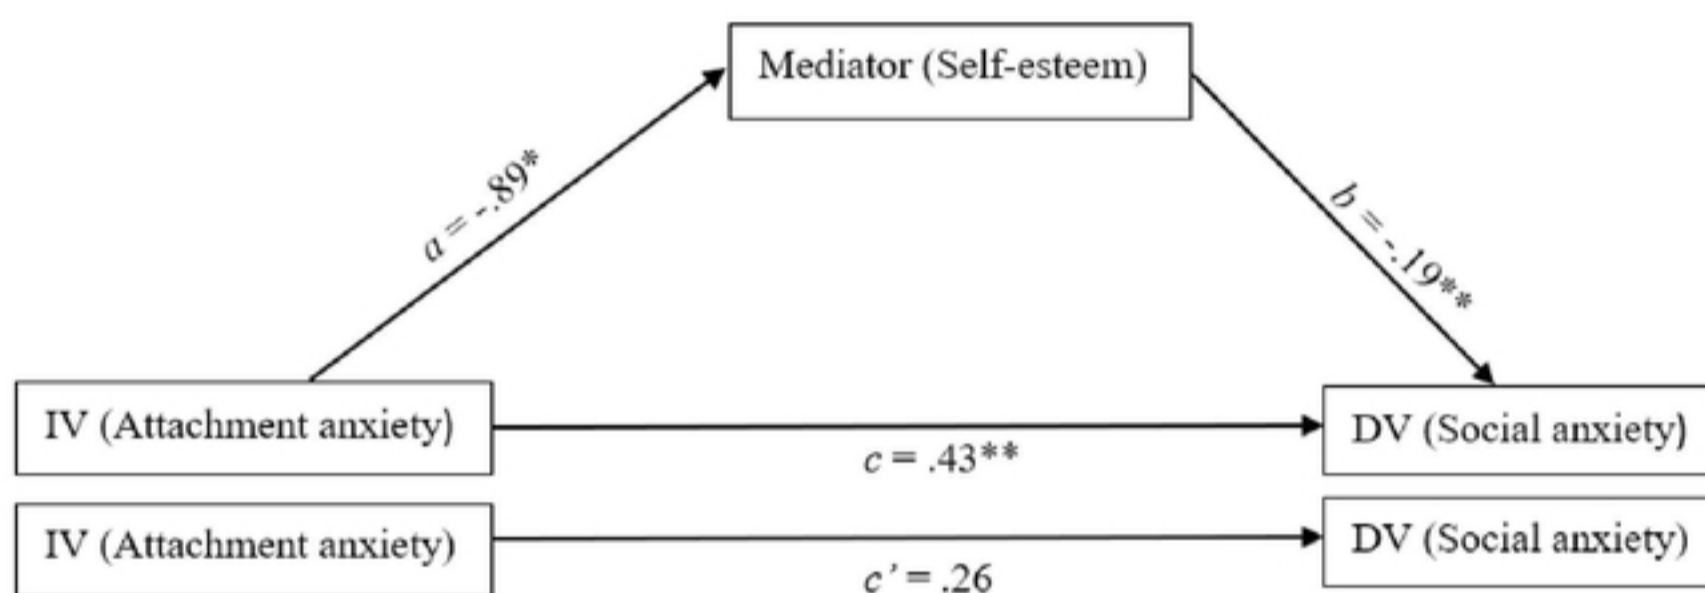

Source: https://www.medrxiv.org/content/10.1101/2024.05.28.24308030v1.full.pdf
